# Supplementary material for: L-Proline-Catalyzed Synthesis of Phthalimide Derivatives and Evaluation of Their Antioxidant, Anti-Inflammatory, and Lipoxygenase Inhibition Activities
Source: Hindawi journal article supplement (doi:10.1155/2018/5198325), 2018-08-01
Supplement: f1 [file 5198325.f1.pdf]

## Supplementary file

# **L-Proline Catalyzed Synthesis of Phthalimide Derivatives and Evaluation of their Antioxidant, Anti-inflammatory and Lipxygenase Inhibition Activities**

**Shagufta Perveen\*, Raha Saud Orfali**

*Department of Pharmacognosy, College of Pharmacy, King Saud University, Riyadh, P.O. Box 2457, Riyadh 11451, Saudi Arabia*

---

Correspondence should be addressed to Shagufta Perveen; [shakhan@ksu.edu.sa](mailto:shakhan@ksu.edu.sa); [shagufta792000@yahoo.com](mailto:shagufta792000@yahoo.com)

A study was planned to synthesize the phthalimide derivatives as phthalimides have versatile biological activities. To synthesize the phthalimide derivatives, initially the reaction was optimized with various catalysts, and L-proline was found to be the best catalyst as it provided excellent yield. A series of phthalimide derivatives was synthesized by facile one-top reaction of phthalic acid with aryl amines under mild reaction conditions in the presence of L-proline as catalyst. Products were obtained in excellent yields and structurally characterized by  $^1\text{H}$ ,  $^{13}\text{C}$  NMR and mass spectral data. Products 1-7 were evaluated for antioxidant, anti-inflammatory and lipoxygenase enzyme inhibition activities. Compounds **1** and **4** showed potent antioxidant activity under DPPH with  $\text{IC}_{50}$  values 27.3 and 25.0  $\mu\text{M}$  when compared with the standard BHA ( $\text{IC}_{50} = 44.2 \mu\text{M}$ ), respectively. Compounds **1** and **4** further showed strong lipoxygenase inhibition activity with  $\text{IC}_{50}$  values 21.34 and 20.45  $\mu\text{M}$  when compared with standard Baicalein ( $\text{IC}_{50} = 22.60 \mu\text{M}$ ), respectively. Compound 2 was found to be promising and about equal to the used standard Aspirin in the inhibition of Bovine serum albumin denaturation, while other compounds showed weak to moderate % inhibition.

**Keywords:** Phthalimides, Synthesis, Structural characterization, Anti-inflammatory, Antioxidant

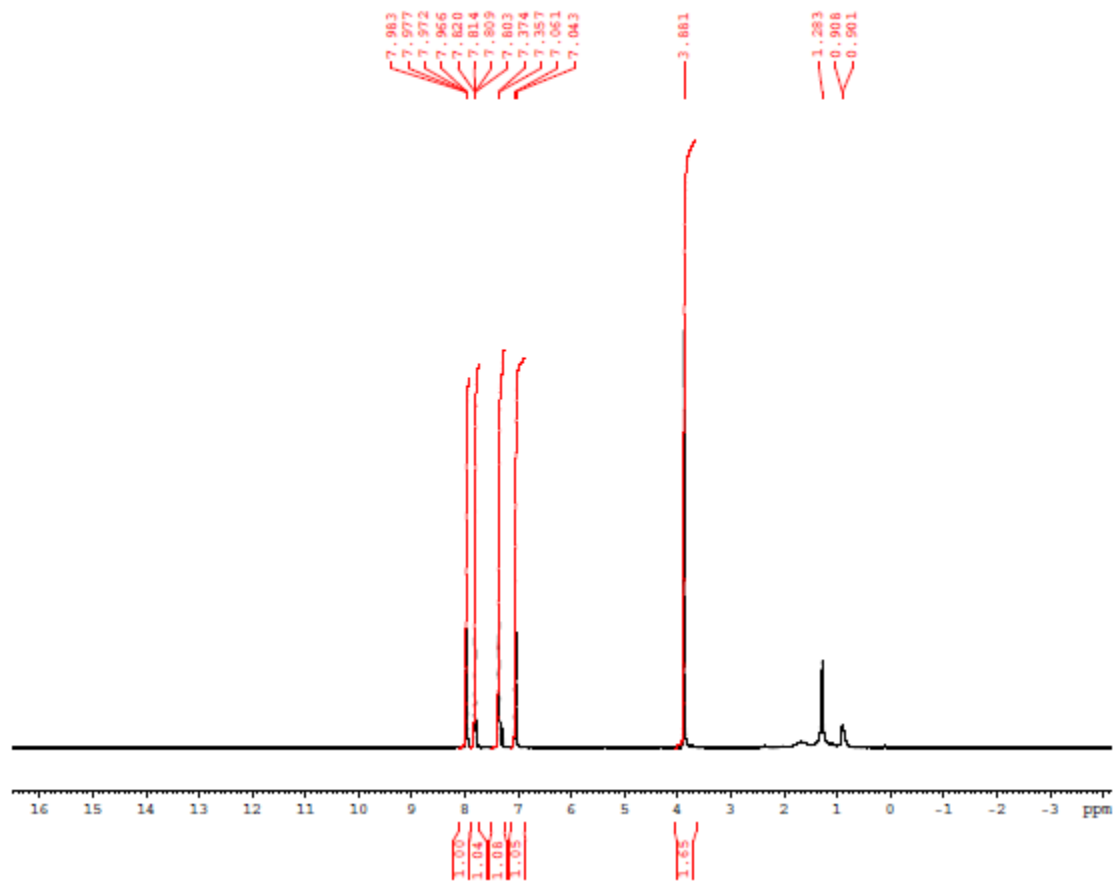

Figure S1. <sup>1</sup>H-NMR of compound **1**.

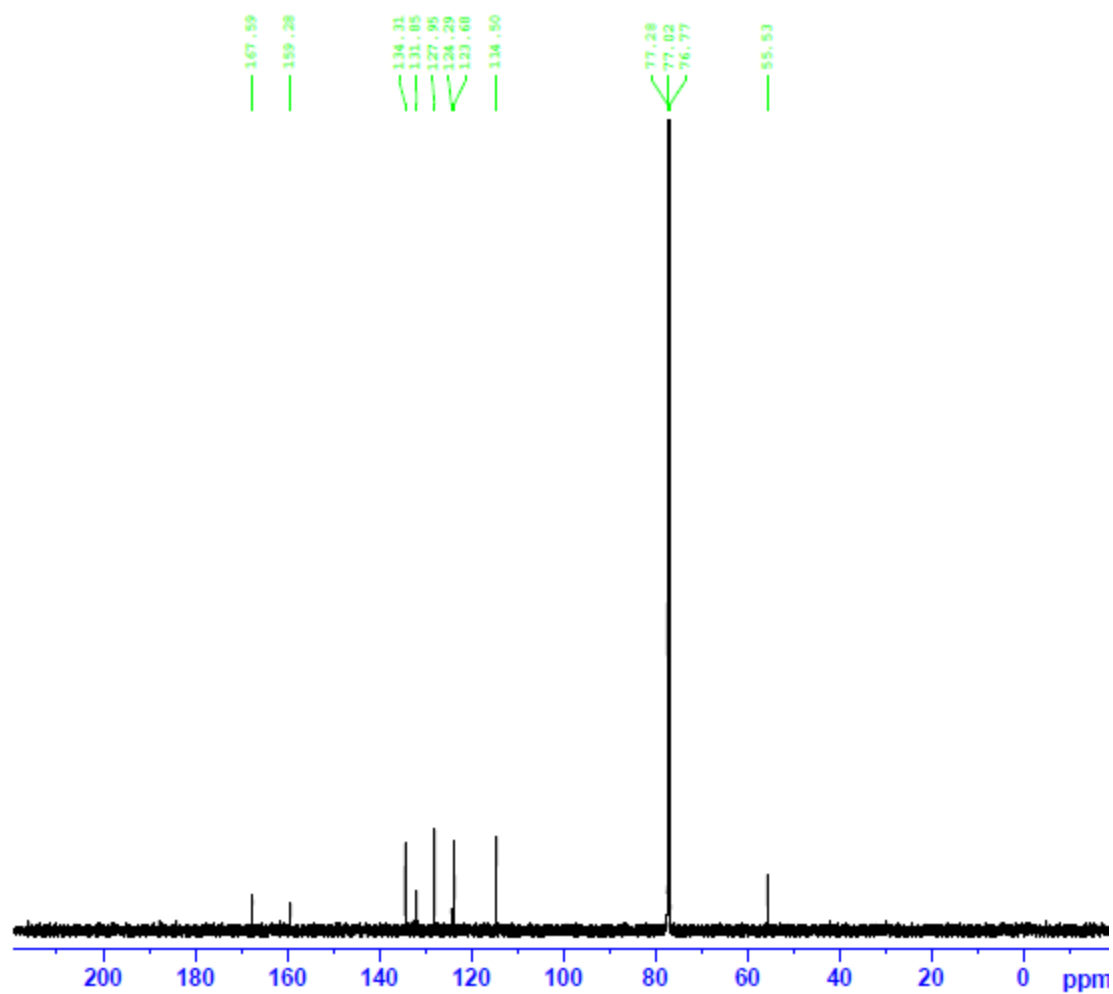

Figure S2. <sup>13</sup>C-NMR of compound 1.

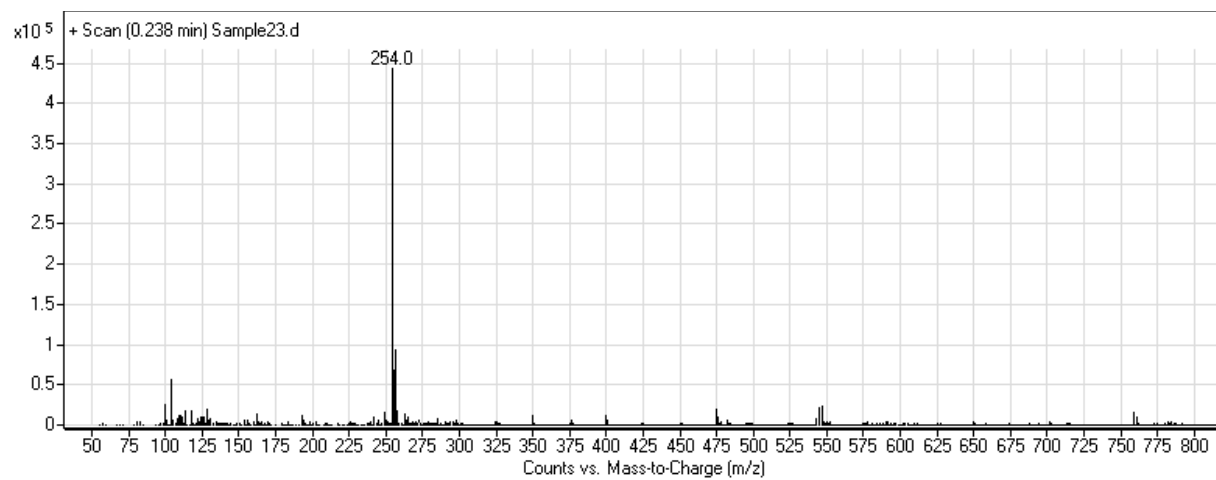

Figure S3. ESI-MS of compound **1**.

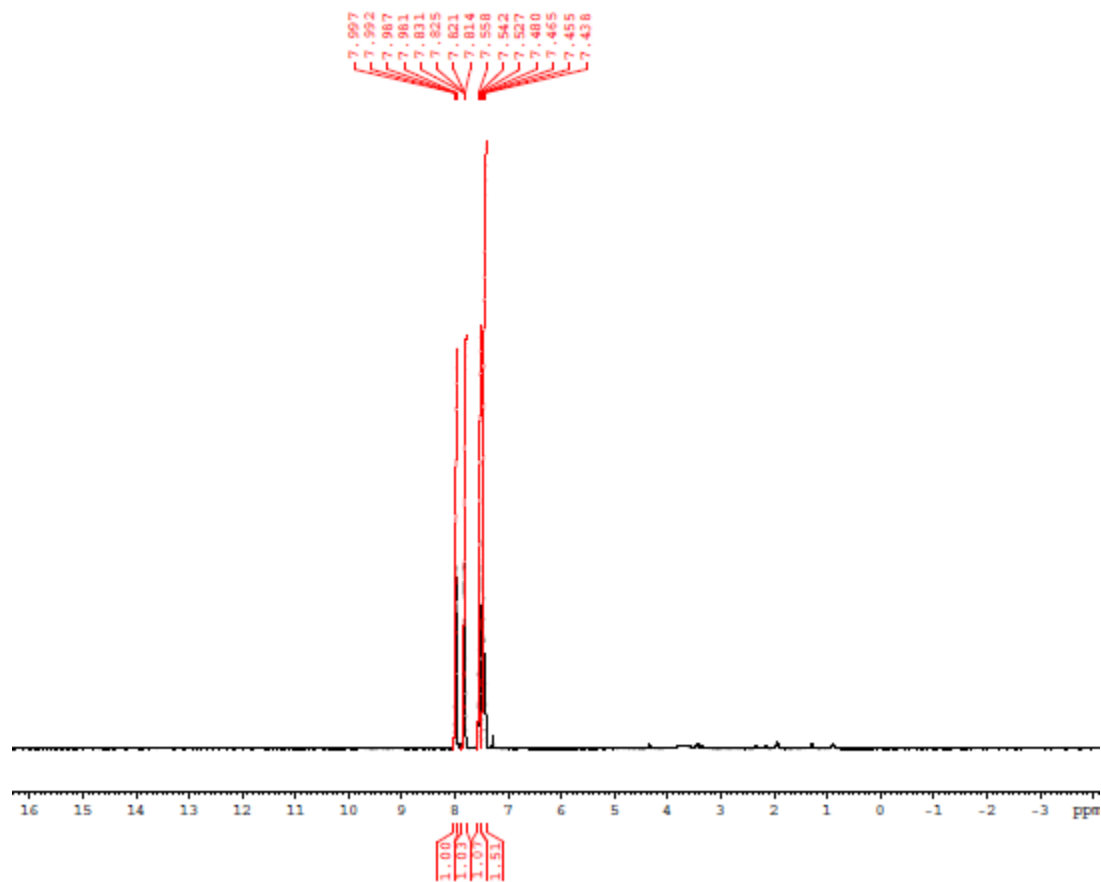

Figure S4.  $^1\text{H}$ -NMR of compound **2**.

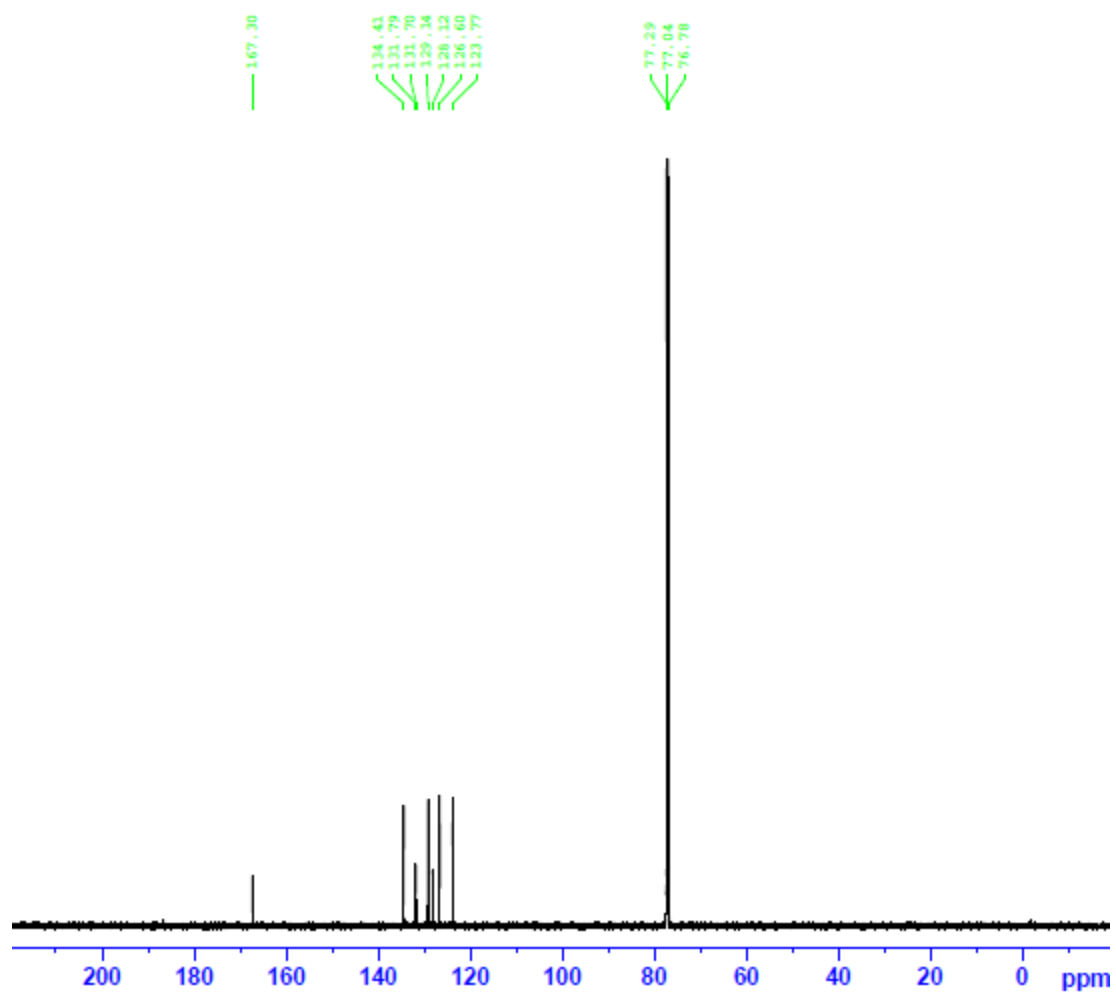

Figure S5. <sup>13</sup>C-NMR of compound **2**.

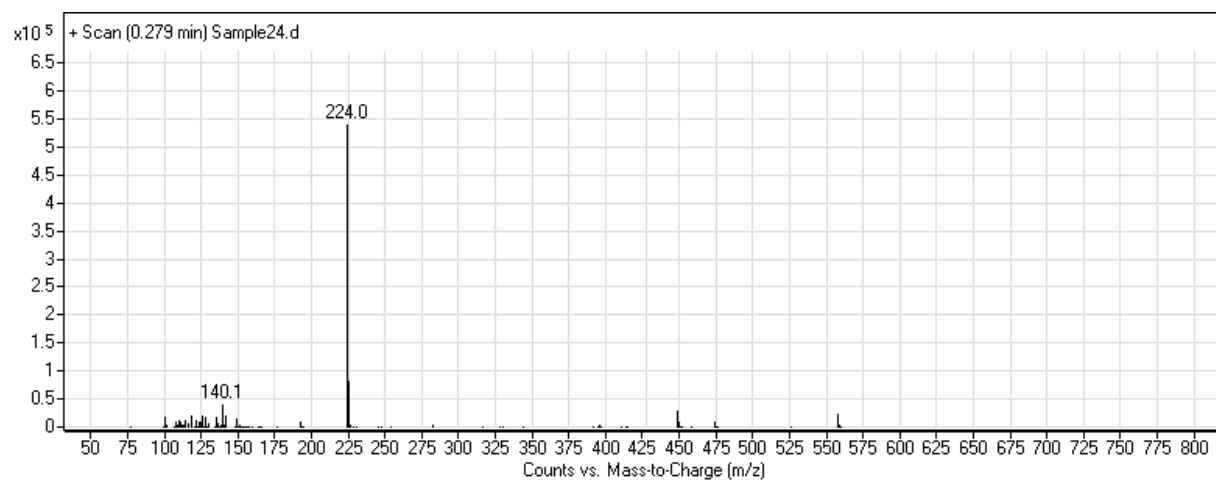

Figure S6. ESI-MS of compound **2**.



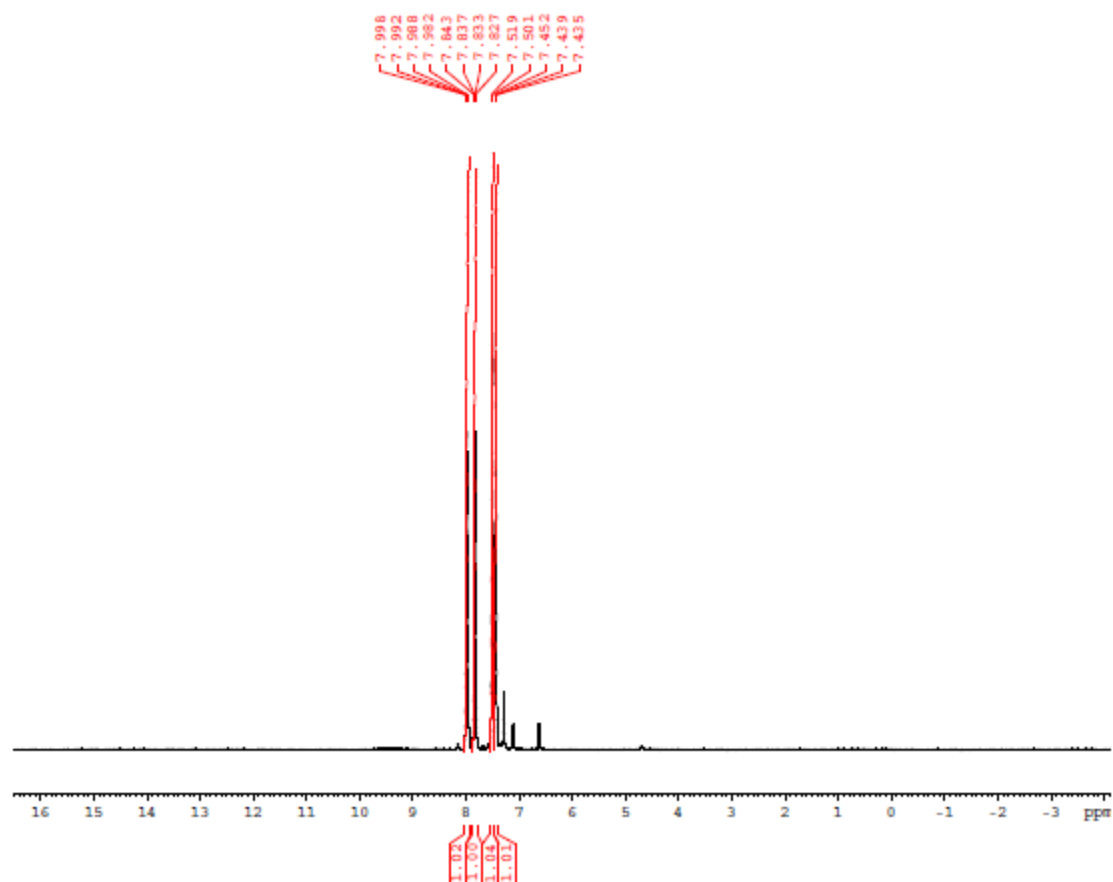

Figure S7.  $^1\text{H}$ -NMR of compound **3**.

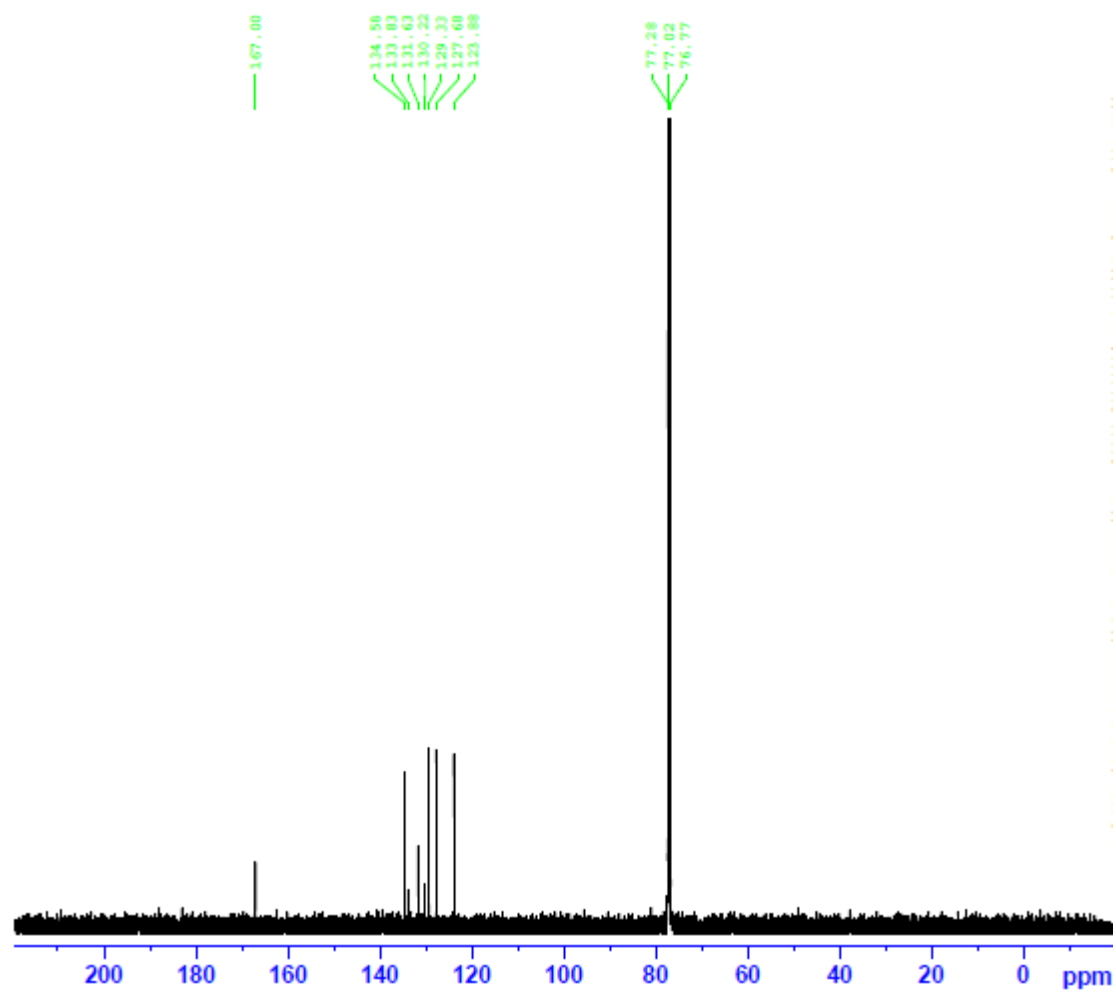

Figure S8. <sup>13</sup>C-NMR of compound **3**.

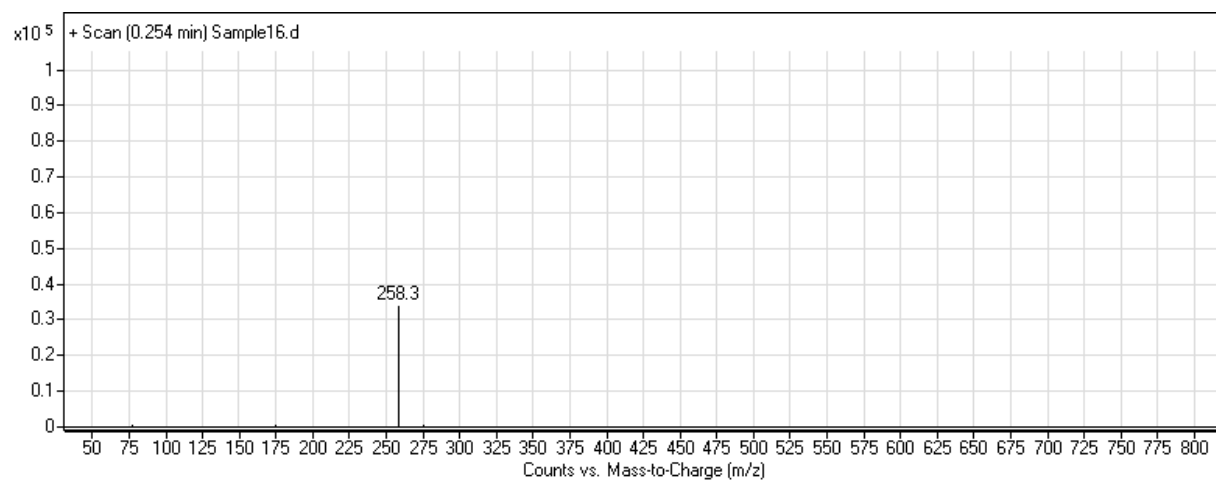

Figure S9. ESI-MS of compound **3**.

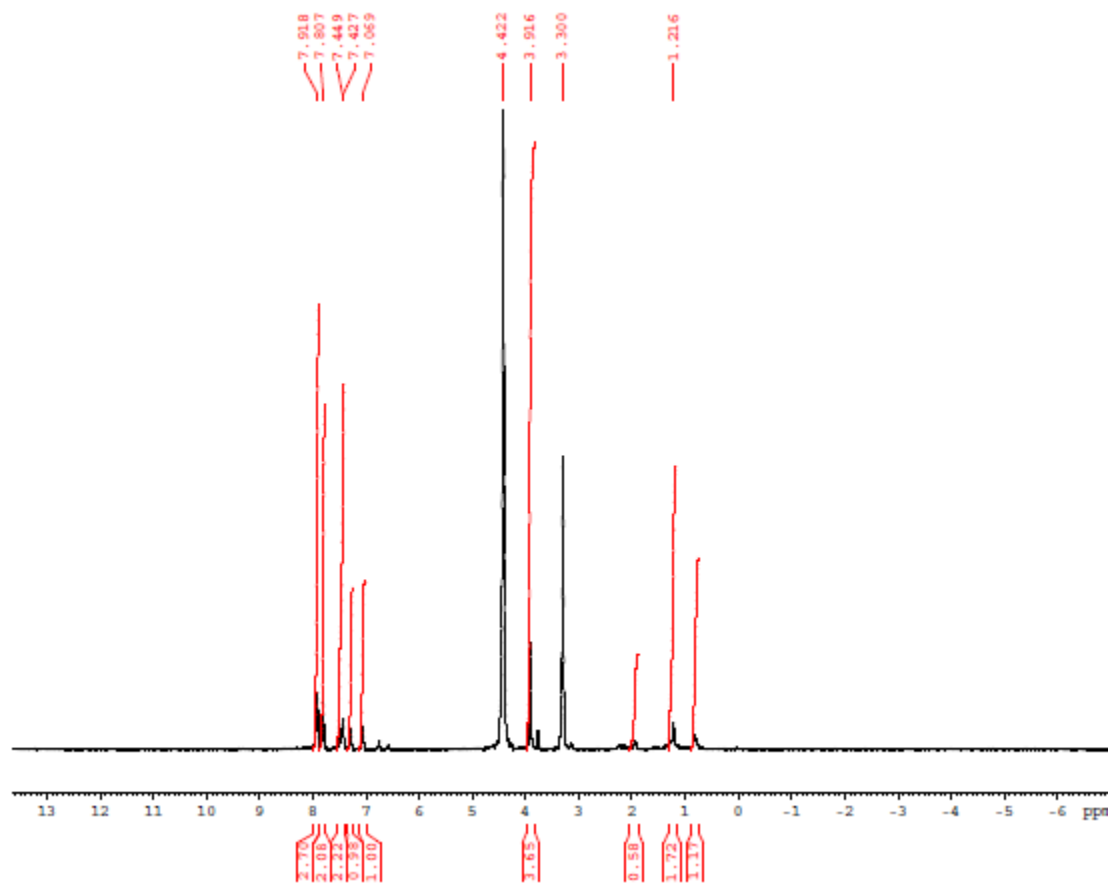

Figure S10. <sup>1</sup>H-NMR of compound 4.

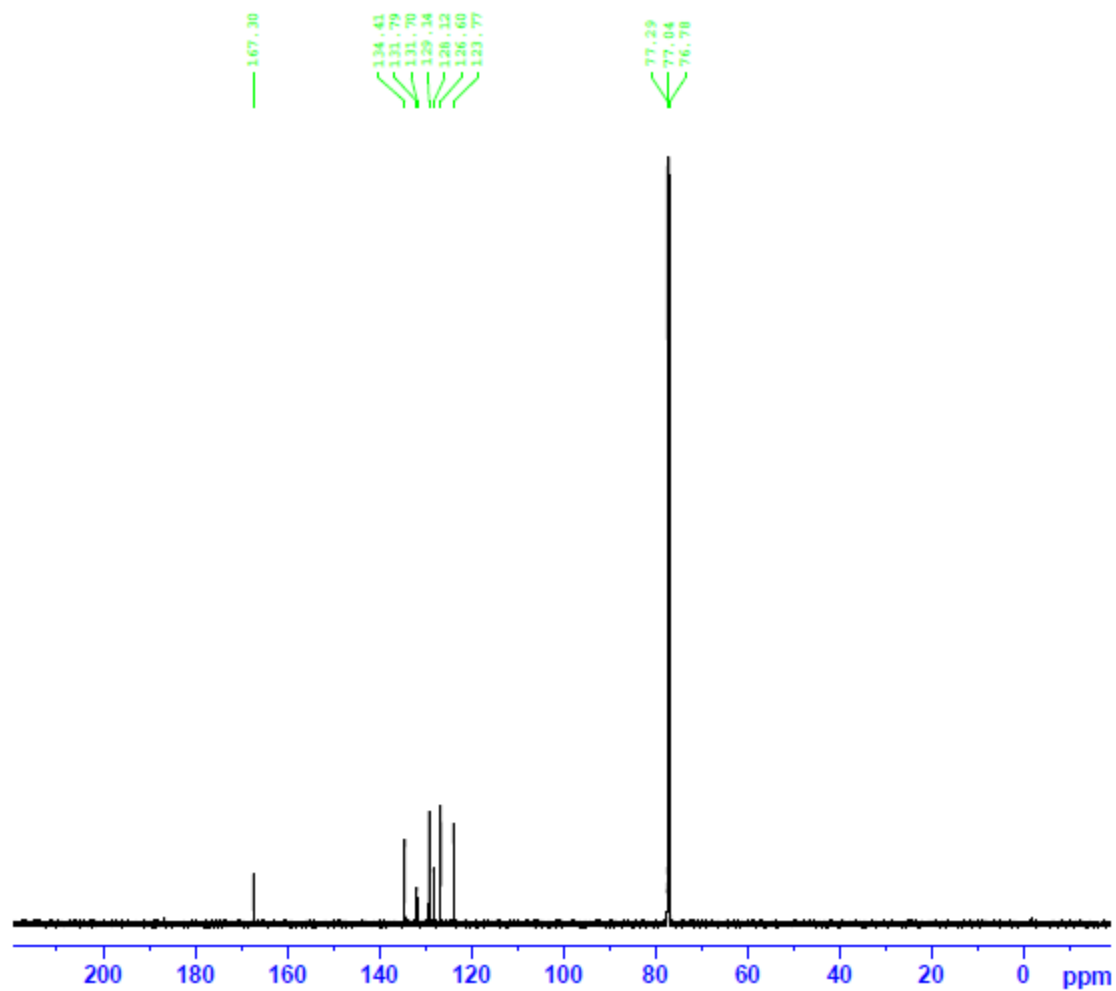

Figure S11. <sup>13</sup>C-NMR of compound 4.

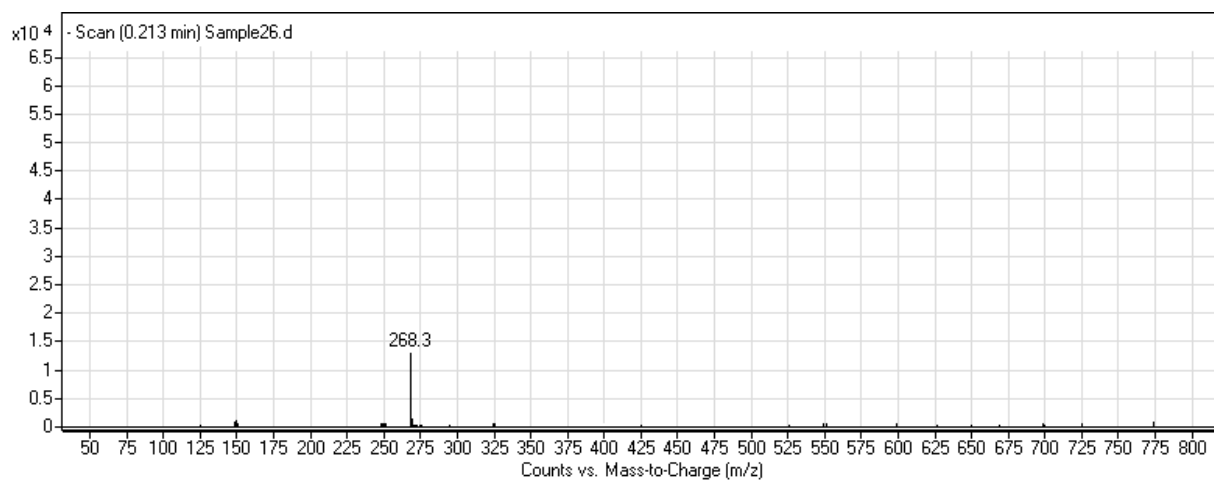

Figure S12. ESI-MS of compound **4**.

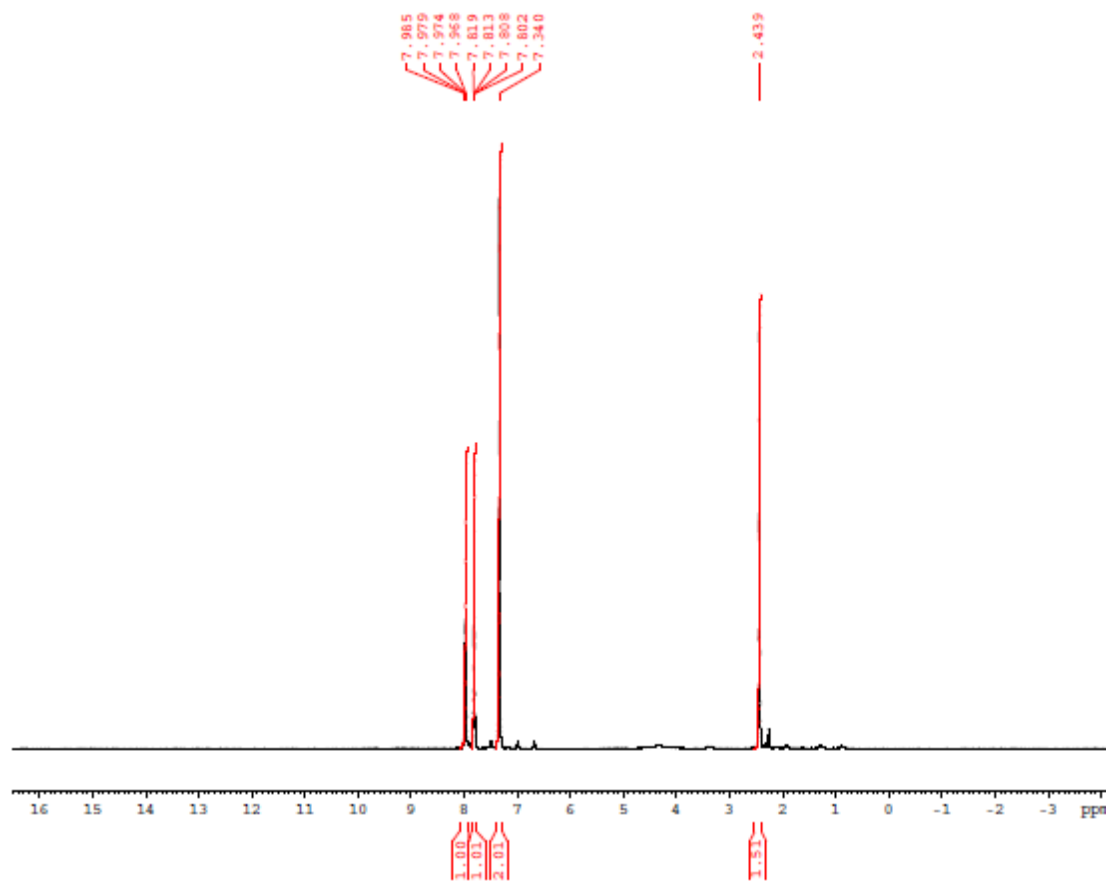

Figure S13.  $^1\text{H}$ -NMR of compound 5.

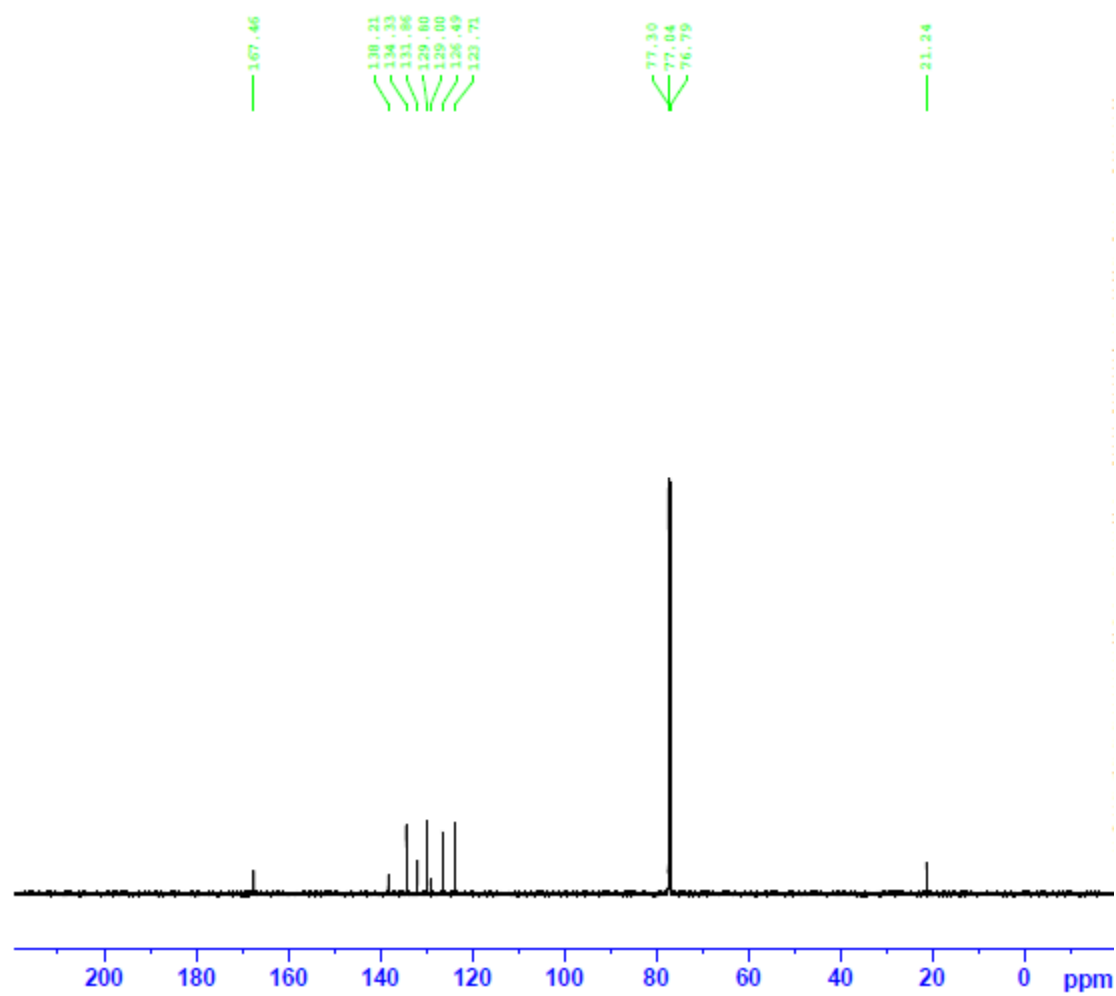

Figure S14. <sup>13</sup>C-NMR of compound **5**.



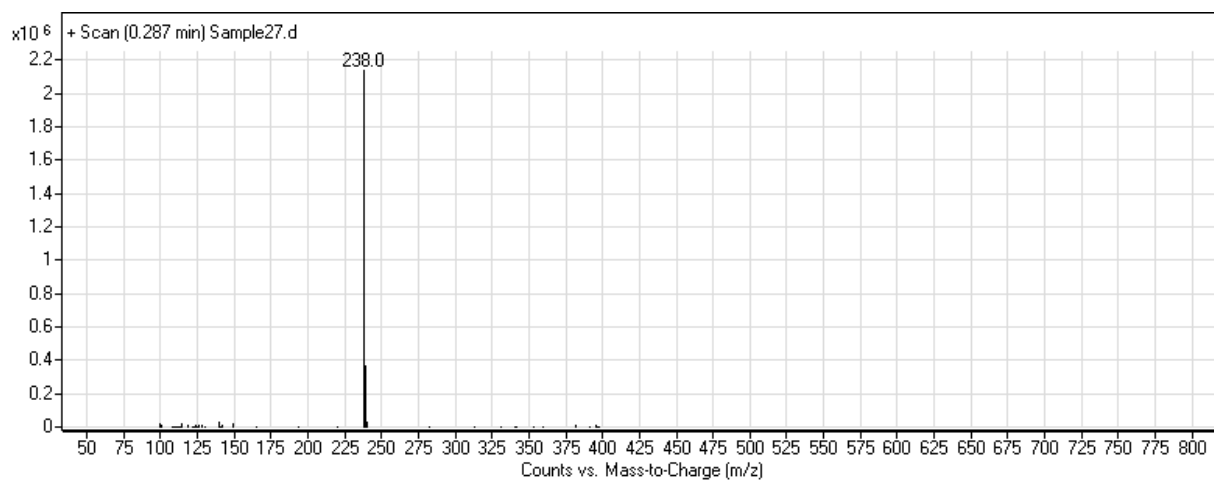

Figure S15. ESI-MS of compound **5** & **6**.

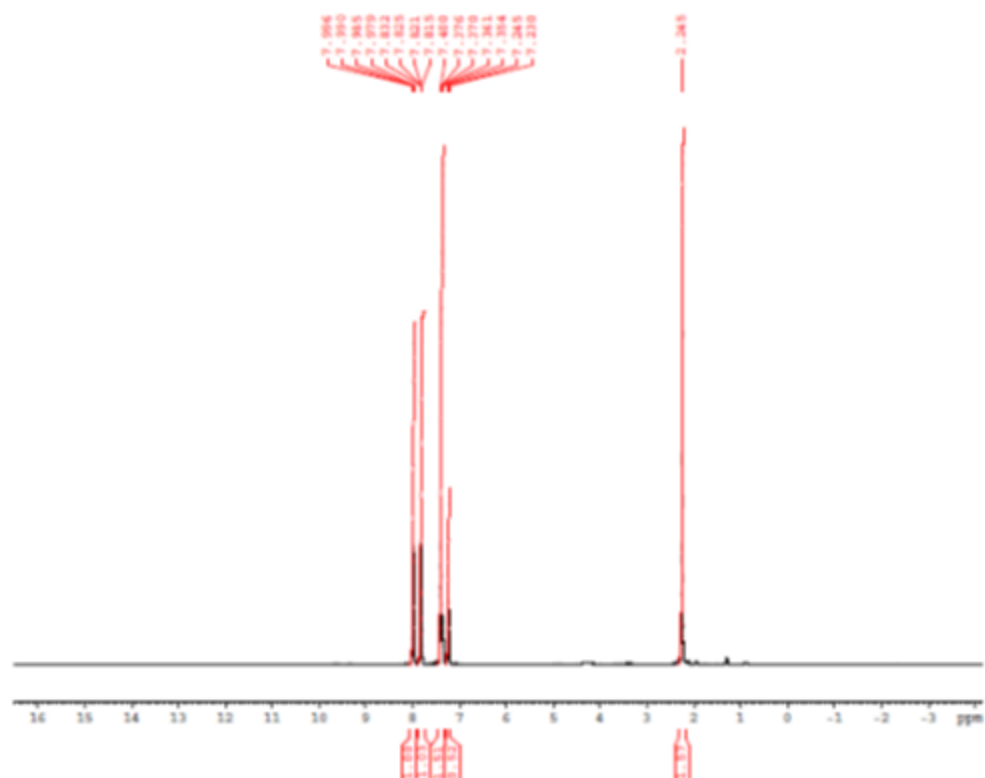

Figure S16.  $^1\text{H}$ -NMR spectra of compound 6.

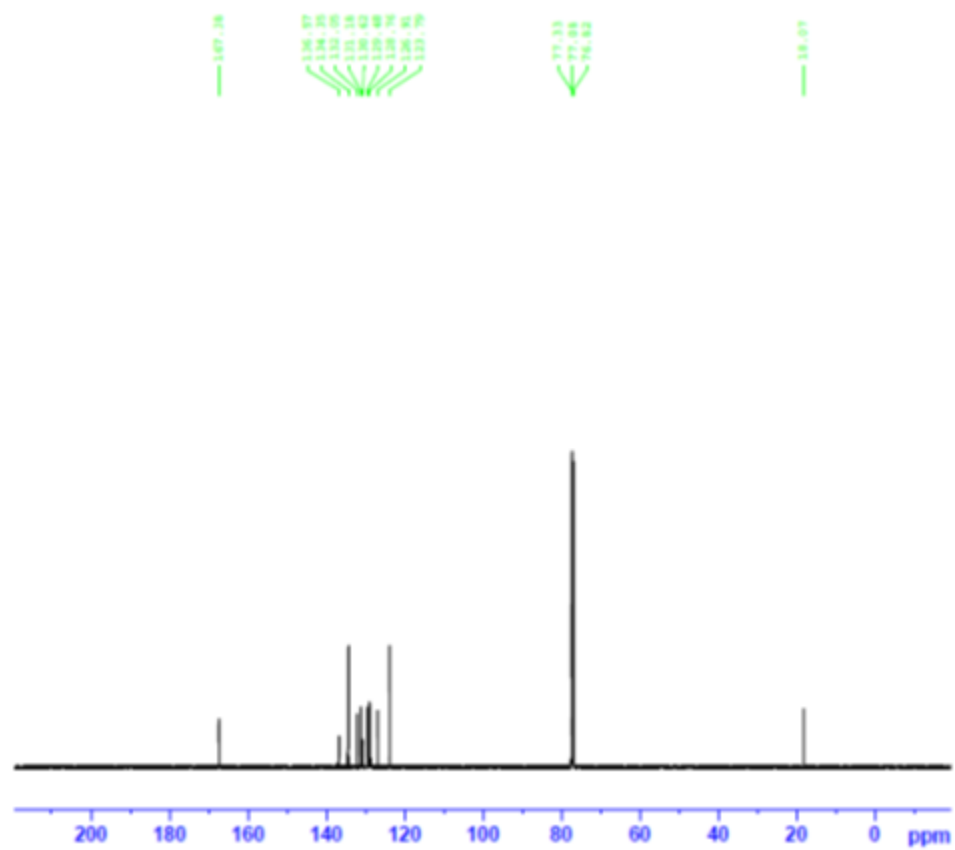

Figure S17.  $^{13}\text{C}$ -NMR spectra of compound **6**.

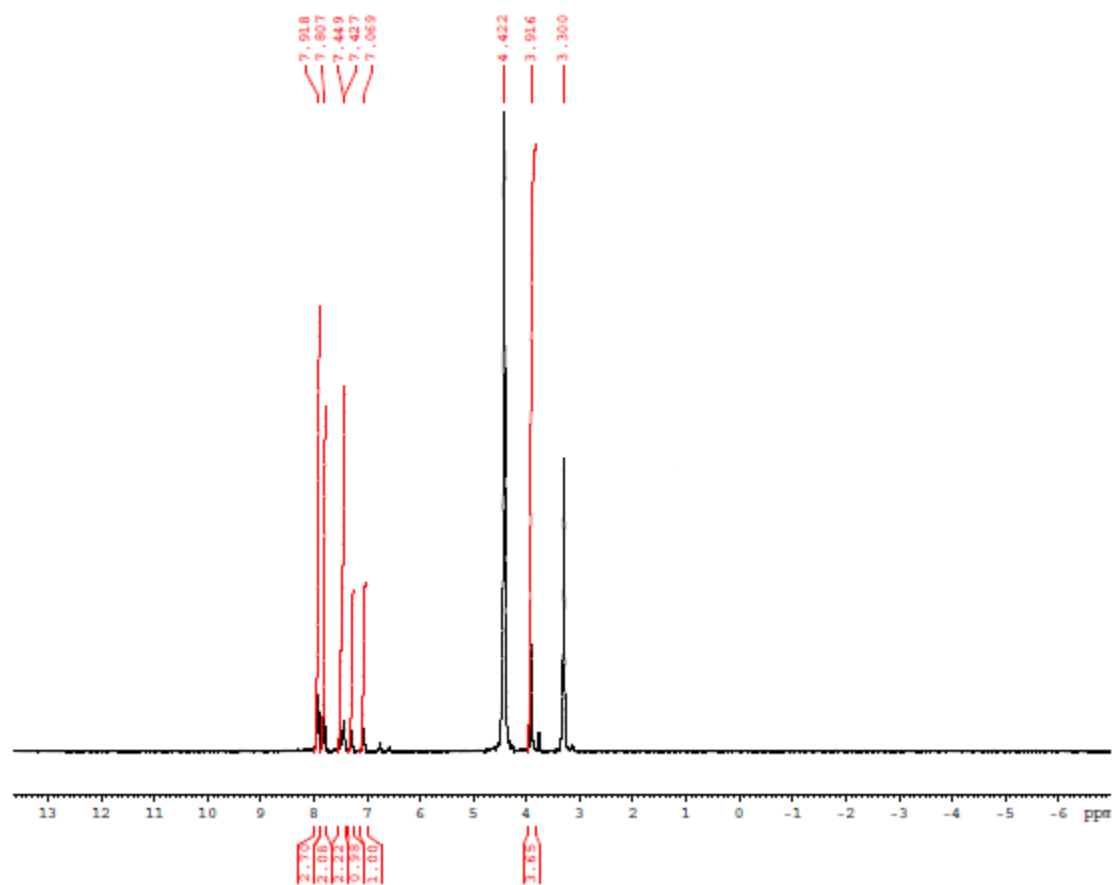

Figure S18. <sup>1</sup>H-NMR of compound 7.

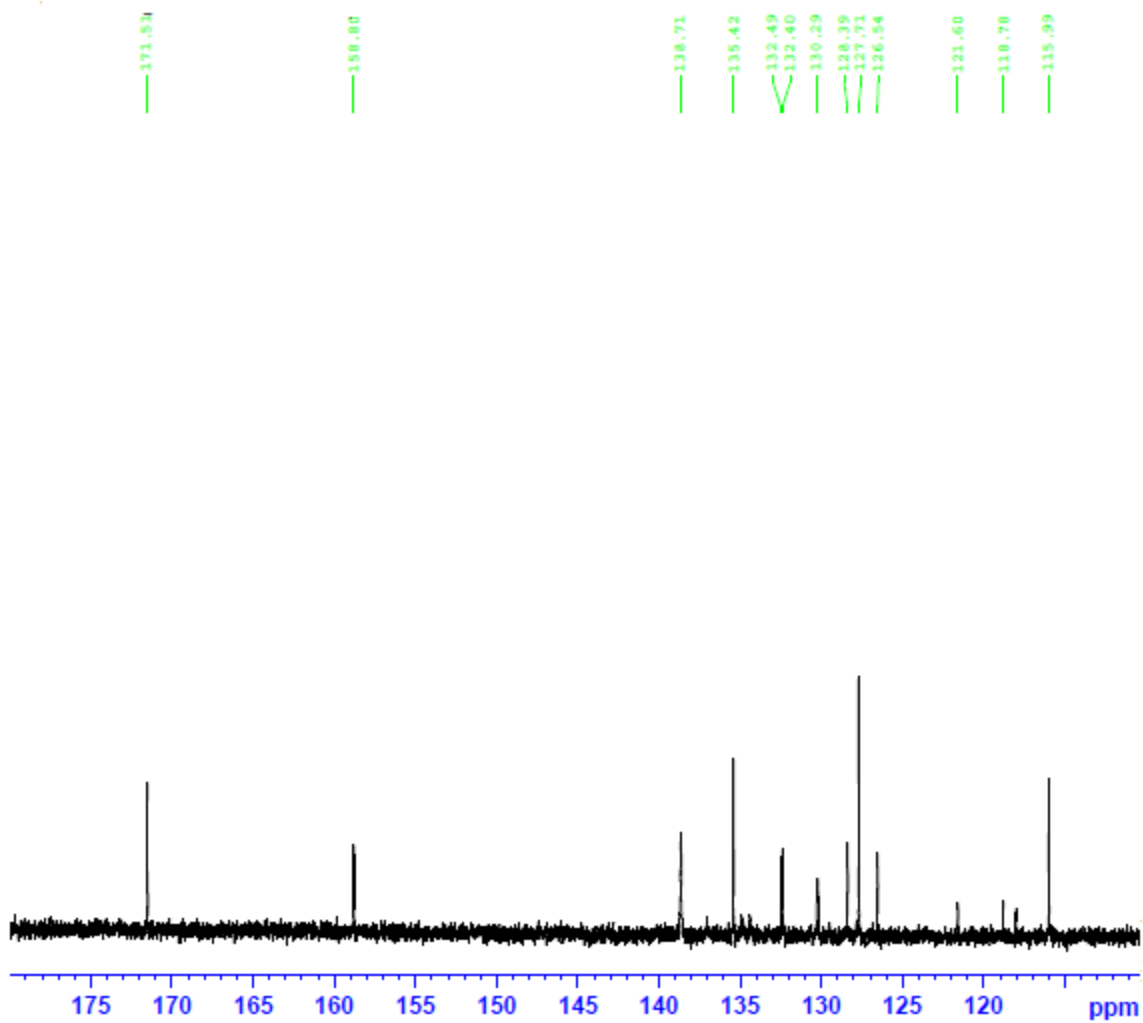

Figure S19.  $^{13}\text{C}$ -NMR of compound 7.

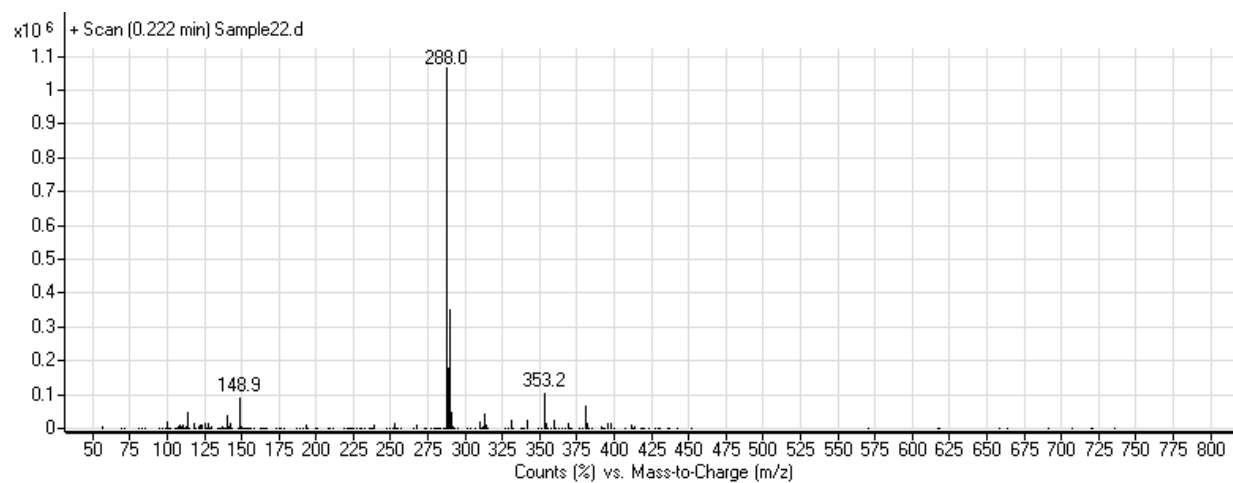

Figure S20. ESI-MS of compound 7.
